# Supplementary material
Source: PubMed Central journal article supplement (PMC8021611)

STable 1: Bayesian Information Criterion estimates of model fit with and without interaction of sex with smoothed age effect (main effect). SAPS=Scale for the Assessment of Positive Symptoms; SANS=Scale for the Assessment of Negative Symptoms

|                           | <b>Interaction + Main Effect</b> | <b>Main Effect Only</b> |
|---------------------------|----------------------------------|-------------------------|
| SAPS Total Score          | 3537.4                           | 3537.3                  |
| SAPS Perceptual Score     | 3524.8                           | 3522.2                  |
| SAPS Non-Perceptual Score | 3450.2                           | 3450.6                  |
| SANS Total Score          | 873.8                            | 872.8                   |

STable 2: Developmental effects on psychotic symptoms in first episode psychosis when Intelligence Quotient (IQ) is included as covariate. SAPS=Scale for the Assessment of Positive Symptoms; SANS=Scale for the Assessment of Negative Symptoms

|                          | <b>F-value</b> | <b>p-value</b> | <b>q-value</b> |
|--------------------------|----------------|----------------|----------------|
| SAPS Total Score         | 0.26           | 0.565          | 0.565          |
| SAPS Perceptual Score    | 4.23           | 0.014          | 0.028          |
| SAPS NonPerceptual Score | 5.29           | 0.005          | 0.02           |
| SANS Total Score         | 0.71           | 0.365          | 0.487          |

STable 3: Developmental effects on psychotic symptoms in first episode psychosis when parental socioeconomic status is included as covariate. SAPS=Scale for the Assessment of Positive Symptoms; SANS=Scale for the Assessment of Negative Symptoms

|                          | <b>F-value</b> | <b>p-value</b> | <b>q-value</b> |
|--------------------------|----------------|----------------|----------------|
| SAPS Total Score         | 0.17           | 0.666          | 0.725          |
| SAPS Perceptual Score    | 7.40           | 0.002          | 0.008          |
| SAPS NonPerceptual Score | 2.73           | 0.044          | 0.088          |
| SANS Total Score         | 0.12           | 0.725          | 0.725          |

STable 4: Developmental effects on psychotic symptoms in first episode psychosis when illness duration is included as covariate in the model. SAPS=Scale for the Assessment of Positive Symptoms; SANS=Scale for the Assessment of Negative Symptoms

|                          | <b>F-value</b> | <b>p-value</b> | <b>q-value</b> |
|--------------------------|----------------|----------------|----------------|
| SAPS Total Score         | 0.04           | 0.846          | 0.954          |
| SAPS Perceptual Score    | 8.32           | 1.93e-04       | 7.72e-04       |
| SAPS NonPerceptual Score | 2.32           | 0.065          | 0.13           |

|                  | <b>F-value</b> | <b>p-value</b> | <b>q-value</b> |
|------------------|----------------|----------------|----------------|
| SANS Total Score | 0.00           | 0.954          | 0.954          |

STable 5: Developmental effects on psychotic symptoms in first episode psychosis when antipsychotic medication status at each time point is included as covariate.SAPS=Scale for the Assessment of Positive Symptoms; SANS=Scale for the Assessment of Negative Symptoms

|                          | <b>F-value</b> | <b>p-value</b> | <b>q-value</b> |
|--------------------------|----------------|----------------|----------------|
| SAPS Total Score         | 0.31           | 0.577          | 0.769          |
| SAPS Perceptual Score    | 7.43           | 6.04e-04       | 0.002          |
| SAPS NonPerceptual Score | 3.95           | 0.018          | 0.036          |
| SANS Total Score         | 0.01           | 0.931          | 0.931          |

STable 6: Developmental effects on psychotic symptoms in first episode psychosis when race is included as covariate.SAPS=Scale for the Assessment of Positive Symptoms; SANS=Scale for the Assessment of Negative Symptoms

|                          | <b>F-value</b> | <b>p-value</b> | <b>q-value</b> |
|--------------------------|----------------|----------------|----------------|
| SAPS Total Score         | 0.41           | 0.524          | 0.699          |
| SAPS Perceptual Score    | 7.40           | 4.24e-04       | 0.002          |
| SAPS NonPerceptual Score | 4.16           | 0.014          | 0.028          |
| SANS Total Score         | 0.04           | 0.835          | 0.835          |

STable 7: Developmental effects on psychotic symptoms in first episode psychosis when lifetime cannabis disorder diagnosis as covariate.SAPS=Scale for the Assessment of Positive Symptoms; SANS=Scale for the Assessment of Negative Symptoms

|                          | <b>F-value</b> | <b>p-value</b> | <b>q-value</b> |
|--------------------------|----------------|----------------|----------------|
| SAPS Total Score         | 0.30           | 0.585          | 0.78           |
| SAPS Perceptual Score    | 7.34           | 4.96e-04       | 0.002          |
| SAPS NonPerceptual Score | 3.87           | 0.02           | 0.04           |
| SANS Total Score         | 0.00           | 0.965          | 0.965          |

STable 8: Developmental effects on psychotic symptoms in first episode psychosis when lifetime cannabis disorder diagnosis (excluding individuals in full remission ) as covariate. SAPS=Scale for the Assessment of Positive Symptoms; SANS=Scale for the Assessment of Negative Symptoms

|                  | <b>F-value</b> | <b>p-value</b> | <b>q-value</b> |
|------------------|----------------|----------------|----------------|
| SAPS Total Score | 0.30           | 0.585          | 0.78           |

|                          | <b>F-value</b> | <b>p-value</b> | <b>q-value</b> |
|--------------------------|----------------|----------------|----------------|
| SAPS Perceptual Score    | 7.34           | 4.96e-04       | 0.002          |
| SAPS NonPerceptual Score | 3.87           | 0.02           | 0.04           |
| SANS Total Score         | 0.00           | 0.965          | 0.965          |

STable 9: Developmental effects on psychotic symptoms in first episode psychosis when current cannabis disorder diagnosis is included as covariate. SAPS=Scale for the Assessment of Positive Symptoms; SANS=Scale for the Assessment of Negative Symptoms

|                          | <b>F-value</b> | <b>p-value</b> | <b>q-value</b> |
|--------------------------|----------------|----------------|----------------|
| SAPS Total Score         | 0.30           | 0.585          | 0.78           |
| SAPS Perceptual Score    | 7.59           | 4.98e-04       | 0.002          |
| SAPS NonPerceptual Score | 4.15           | 0.014          | 0.028          |
| SANS Total Score         | 0.02           | 0.897          | 0.897          |

STable 10: Developmental effects on psychotic symptoms in first episode psychosis when number of days between visits is included as covariate. SAPS=Scale for the Assessment of Positive Symptoms; SANS=Scale for the Assessment of Negative Symptoms

|                          | <b>F-value</b> | <b>p-value</b> | <b>q-value</b> |
|--------------------------|----------------|----------------|----------------|
| SAPS Total Score         | 0.32           | 0.567          | 0.756          |
| SAPS Perceptual Score    | 6.87           | 0.001          | 0.004          |
| SAPS NonPerceptual Score | 4.05           | 0.016          | 0.032          |
| SANS Total Score         | 0.07           | 0.797          | 0.797          |

STable 11: Age-associated effects of psychotic symptoms in first episode psychosis when only cross-sectional data (visit 1) is included in the model. SAPS=Scale for the Assessment of Positive Symptoms; SANS=Scale for the Assessment of Negative Symptoms

|                          | <b>F-value</b> | <b>p-value</b> | <b>q-value</b> |
|--------------------------|----------------|----------------|----------------|
| SAPS Total Score         | 1.64           | 0.201          | 0.268          |
| SAPS Perceptual Score    | 4.37           | 0.004          | 0.016          |
| SAPS NonPerceptual Score | 4.62           | 0.009          | 0.018          |
| SANS Total Score         | 0.39           | 0.534          | 0.534          |

STable 12: Developmental effects on psychotic symptoms in first episode psychosis when age at each visit is included as a main effect for all visits. SAPS=Scale for the Assessment of Positive Symptoms; SANS=Scale for the Assessment of Negative Symptoms

|                          | <b>F-value</b> | <b>p-value</b> | <b>q-value</b> |
|--------------------------|----------------|----------------|----------------|
| SAPS Total Score         | 0.24           | 0.604          | 0.805          |
| SAPS Perceptual Score    | 7.43           | 5.99e-04       | 0.002          |
| SAPS NonPerceptual Score | 4.04           | 0.016          | 0.032          |
| SANS Total Score         | 0.00           | 0.952          | 0.952          |

STable 13: Developmental effects on negative symptoms in first episode psychosis. SANS=Scale for the Assessment of Negative Symptoms

|                        | <b>F-value</b> | <b>p-value</b> | <b>q-value</b> |
|------------------------|----------------|----------------|----------------|
| SANS Flat Affect Score | 6.39           | 0.002          | 0.005          |
| SANS Anhedonia Score   | 7.88           | 3.29e-04       | 0.002          |
| SANS Alogia Score      | 2.89           | 0.043          | 0.072          |
| SANS Apathy Score      | 0.60           | 0.477          | 0.477          |
| SANS Attention Score   | 1.52           | 0.221          | 0.276          |

STable 14: Effects of development on change in symptom presentation between each visit. SAPS=Scale for the Assessment of Positive Symptoms, SANS=Scale for the Assessment of Negative Symptoms

|                          | <b>F-value</b> | <b>p-value</b> |
|--------------------------|----------------|----------------|
| SAPS Total Score         | 0.06           | 0.813          |
| SAPS Perceptual Score    | 0.85           | 0.449          |
| SAPS NonPerceptual Score | 0.26           | 0.783          |
| SANS Total Score         | 0.66           | 0.417          |

STable 15: Effects of development on change in symptom presentation between baseline symptom severity and symptom severity at each subsequent visit. SAPS=Scale for the Assessment of Positive Symptoms, SANS=Scale for the Assessment of Negative Symptoms

|                                    | <b>F-value</b> | <b>p-value</b> | <b>q-value</b>     |
|------------------------------------|----------------|----------------|--------------------|
| Change in SAPS Total Score         | 1.12           | 0.436          | 0.5813333333333333 |
| Change in SAPS Perceptual Score    | 2.68           | 0.039          | 0.078              |
| Change in SAPS NonPerceptual Score | 0.55           | 0.66           | 0.66               |
| Change in SANS Total Score         | 4.75           | 0.03           | 0.078              |

SFigure 1: Chart of initial participant sample size, followed by exclusion criteria and number of participants remaining.

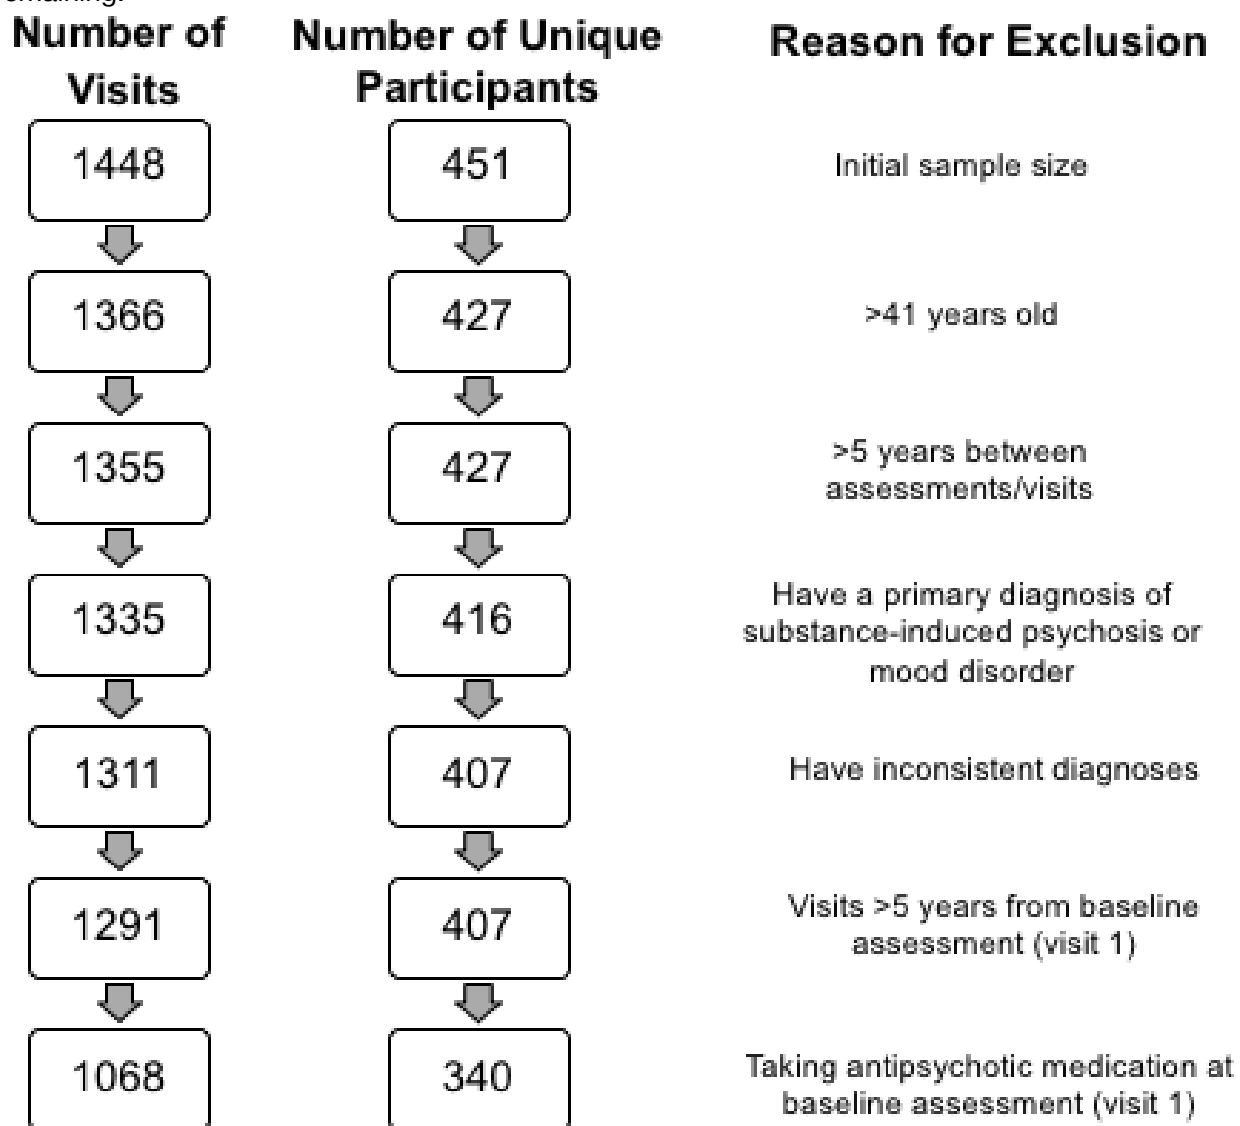

SFigure 2. Developmental effects of A) auditory, B) visual, C) olfactory, and D) somatic hallucinations in first episode psychosis.

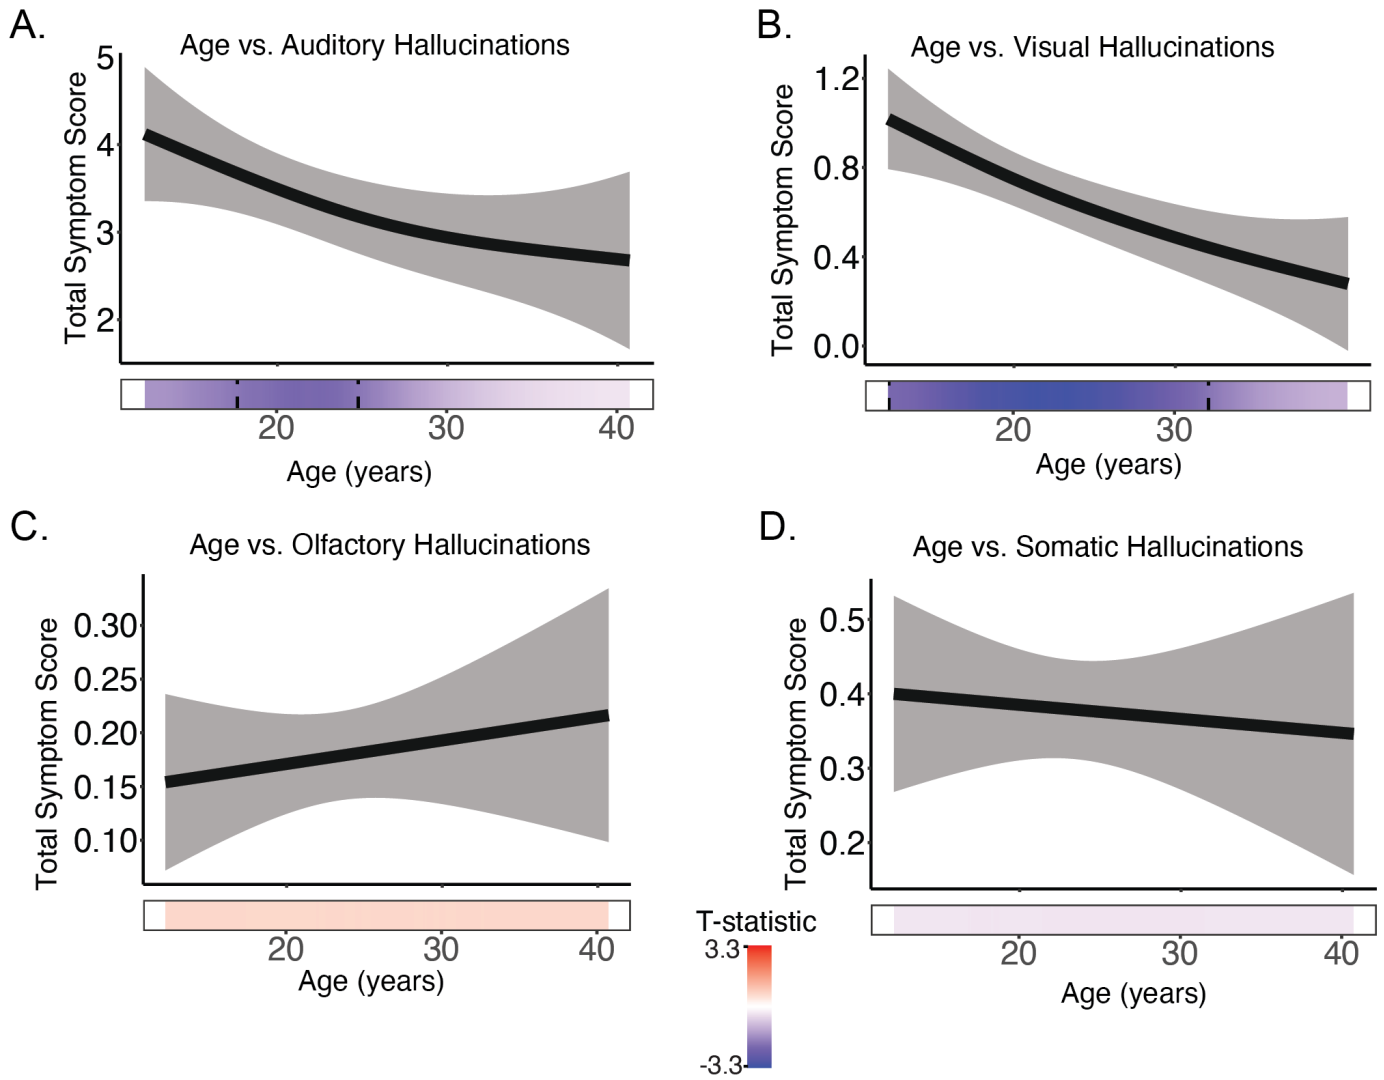

SFigure 3. Developmental effects of A) delusions, B) bizarre thoughts and behaviors, and C) thought disorder symptoms in first episode psychosis.

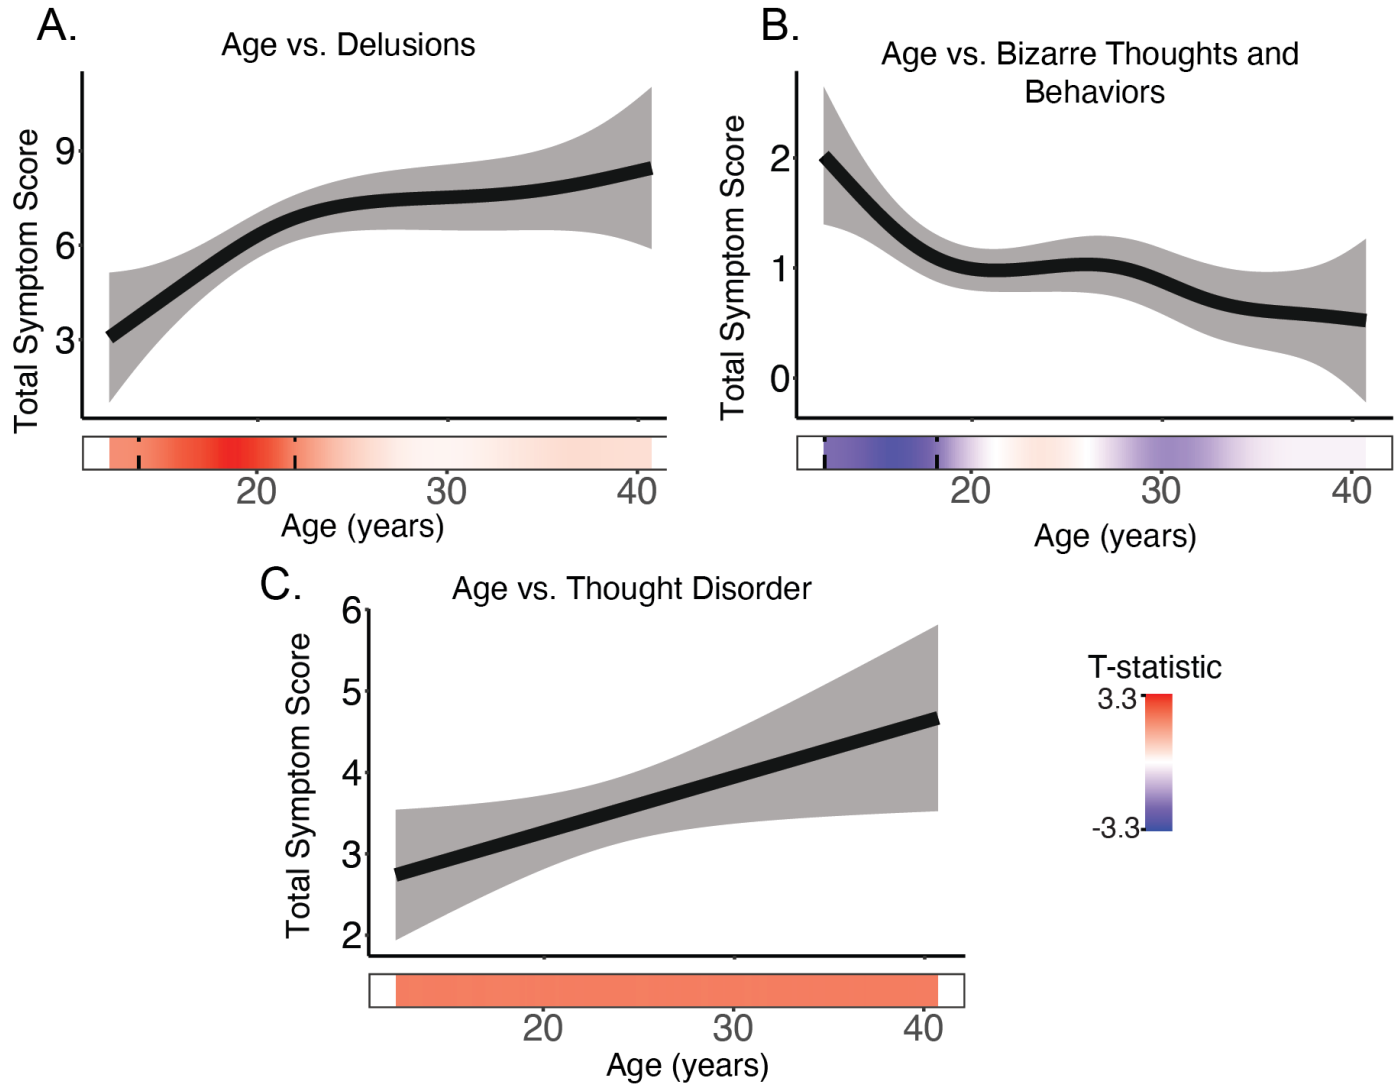

SFigure 4. Developmental effects of A) anhedonia, B) flat affect, C) alogia, D) apathy, and E) attention in first episode psychosis.

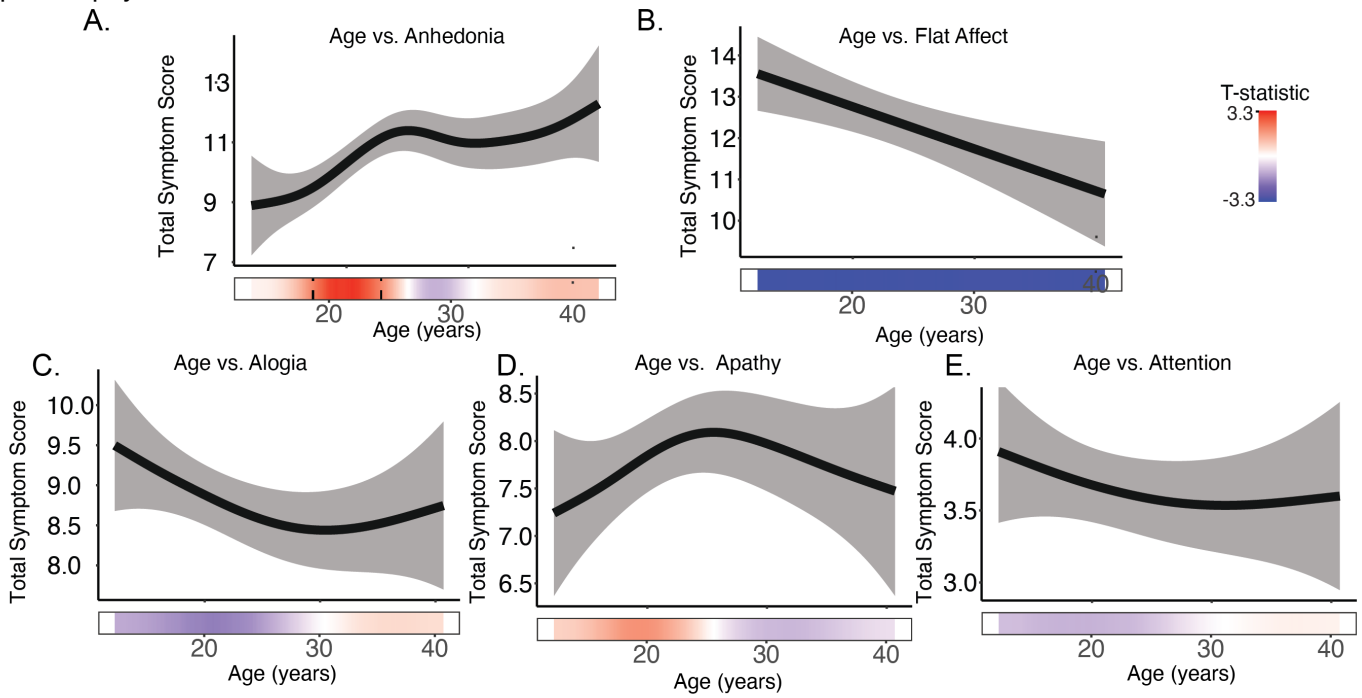



SFigure 5: Waterfall showing length of time between visits for each participant. Individual subjects are on the y-axis and each circle represents an assessment.

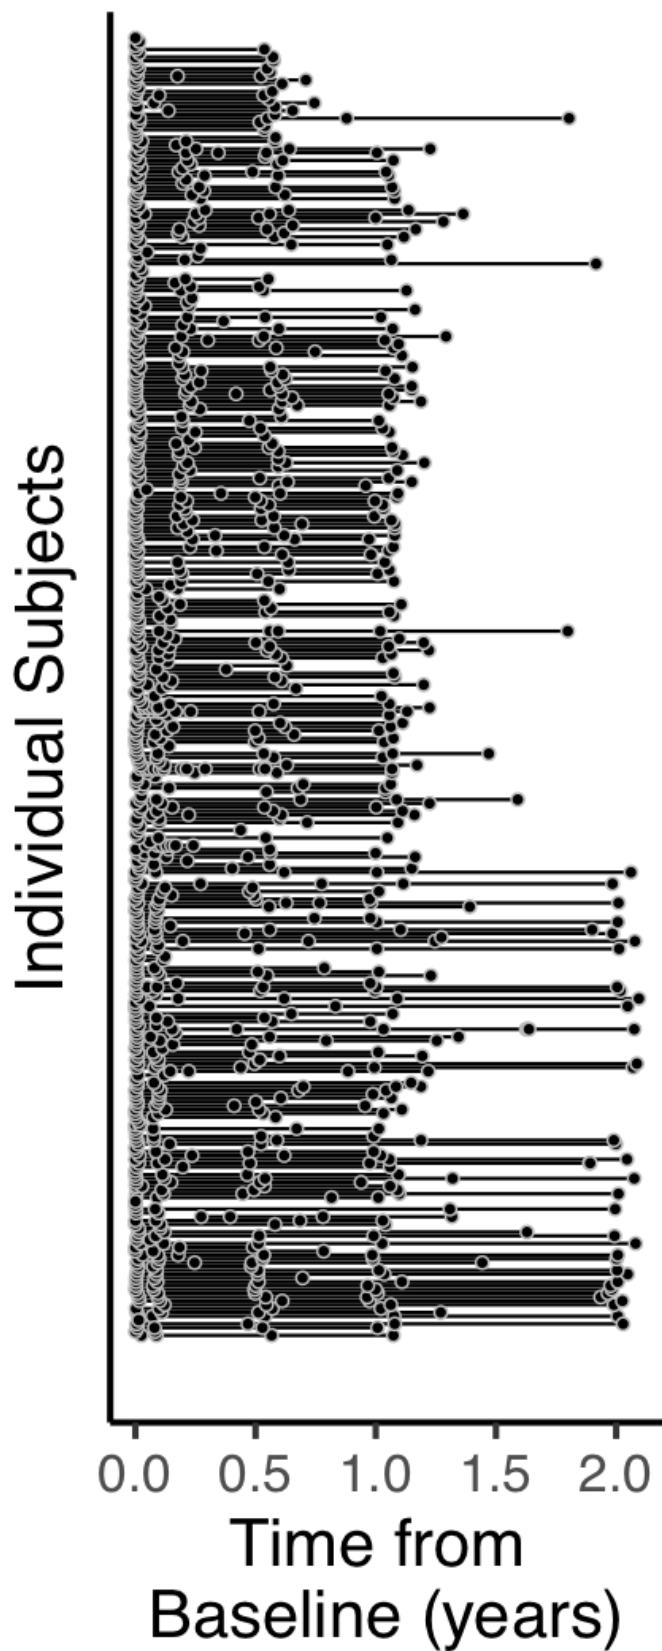

Supplement: NIHMS1668242-supplement-supplemental.pdf [file NIHMS1668242-supplement-supplemental.pdf]
